# Supplementary material
Source: Research Square preprint supplement (doi:10.21203/rs.3.rs-9424520/v1)
Supplement: Supplementary file 1 [file 5972700623b8db55759eed51.docx]

**Table S1** **Resistance rates (%) of *Salmonella Typhimurium* to six main antimicrobials, as reported by the ISPED program in 2017 to 2024**

| **Antibiotic** | **2017** | | **2018** | | **2019** | | **2020** | | **2021** | | **2022** | | **2023** | | **2024** | | ***P*** |
| --- | --- | --- | --- | --- | --- | --- | --- | --- | --- | --- | --- | --- | --- | --- | --- | --- | --- |
| **N** | **R (%)** | **N** | **R (%)** | **N** | **R (%)** | **N** | **R (%)** | **N** | **R (%)** | **N** | **R (%)** | **N** | **R (%)** | **N** | **R (%)** |
| **Ampicillin** | 431 | 85.2 | 250 | 83.2 | 317 | 83.6 | 340 | 88.8 | 697 | 83.6 | 789 | 84.3 | 602 | 87.2 | 325 | 89.8 | 0.036 |
| **Ampicillin/Sulbactam** | 334 | 21.3 | 229 | 17.5 | 272 | 19.9 | 132 | 25.8 | 326 | 15.6 | 272 | 50.4 | 404 | 39.9 | 247 | 32.4 | 0.046 |
| **Ceftriaxone** | 348 | 28.4 | 247 | 23.5 | 484 | 27.9 | 426 | 26.1 | 720 | 27.2 | 617 | 23.7 | 558 | 29.6 | 511 | 28.4 | 0.317 |
| **Azithromycin** | 298 | 11.1 | 217 | 7.8 | 246 | 6.5 | 135 | 10.4 | 411 | 8.8 | 357 | 5.9 | 250 | 9.2 | 43 | 7.0 | 0.326 |
| **Levofloxacin** | 14 | 7.1 | 21 | 4.8 | 310 | 7.7 | 261 | 8.4 | 511 | 5.3 | 371 | 7.3 | 297 | 6.1 | 119 | 7.6 | 0.777 |
| **Trimethoprim/Sulfamethoxazole** | 430 | 42.1 | 251 | 43.0 | 494 | 48.2 | 428 | 47.7 | 745 | 47.1 | 833 | 41.7 | 632 | 48.4 | 400 | 35.0 | <0.001 |

**Table S2 Resistance rates (%) of *Salmonella Enteritidis* to six main antimicrobials, as reported by the ISPED program in 2017 to 2024**

| **Antibiotic** | **2017** | | **2018** | | **2019** | | **2020** | | **2021** | | **2022** | | **2023** | | **2024** | | ***P*** | |
| --- | --- | --- | --- | --- | --- | --- | --- | --- | --- | --- | --- | --- | --- | --- | --- | --- | --- | --- |
| **N** | **R (%)** | **N** | **R (%)** | **N** | **R (%)** | **N** | **R (%)** | **N** | **R (%)** | **N** | **R (%)** | **N** | **R (%)** | **N** | **R (%)** |  |
| **Ampicillin** | 180 | 76.7 | 174 | 81.6 | 182 | 74.2 | 152 | 89.5 | 236 | 81.8 | 132 | 84.9 | 151 | 79.5 | 126 | 83.3 | 0.018 |
| **Ampicillin/Sulbactam** | 168 | 19.6 | 170 | 34.1 | 163 | 18.4 | 134 | 35.8 | 186 | 21.0 | 102 | 47.1 | 143 | 42.0 | 123 | 55.3 | <0.001 |
| **Ceftriaxone** | 170 | 13.5 | 173 | 13.3 | 246 | 6.5 | 172 | 7.6 | 236 | 13.1 | 123 | 15.5 | 155 | 23.2 | 127 | 52.8 | <0.001 |
| **Azithromycin** | 161 | 0.6 | 137 | 1.5 | 147 | 0.7 | 111 | 2.7 | 151 | 5.3 | 65 | 0.0 | 60 | 1.7 | 2 | 0.0 | 0.084* |
| **Levofloxacin** | 5 | 0.0 | 32 | 6.3 | 159 | 0.6 | 128 | 3.1 | 186 | 3.7 | 112 | 5.4 | 138 | 8.7 | 109 | 46.8 | <0.001* |
| **Trimethoprim/Sulfamethoxazole** | 181 | 3.9 | 173 | 14.5 | 251 | 5.2 | 173 | 10.4 | 241 | 8.3 | 136 | 14.0 | 157 | 15.3 | 112 | 39.3 | <0.001 |

**Note:** *: Fisher's Exact Test.

**Table S3 Resistance rates (%) ofother serotype to six main antimicrobials, as reported by the ISPED program in 2017 to 2024**

| **Antibiotic** | **2017** | | **2018** | | **2019** | | **2020** | | **2021** | | **2022** | | **2023** | | **2024** | | ***P*** | |
| --- | --- | --- | --- | --- | --- | --- | --- | --- | --- | --- | --- | --- | --- | --- | --- | --- | --- | --- |
| **N** | **R (%)** | **N** | **R (%)** | **N** | **R (%)** | **N** | **R (%)** | **N** | **R (%)** | **N** | **R (%)** | **N** | **R (%)** | **N** | **R (%)** |  |
| **Ampicillin** | 222 | 70.7 | 275 | 71.3 | 92 | 50.0 | 175 | 62.9 | 257 | 67.3 | 147 | 47.6 | 71 | 54.9 | 24 | 45.8 | <0.001 |
| **Ampicillin/Sulbactam** | 212 | 50.0 | 259 | 50.6 | 87 | 18.4 | 157 | 17.8 | 213 | 26.8 | 77 | 20.8 | 37 | 24.3 | 17 | 17.6 | <0.001 |
| **Ceftriaxone** | 214 | 18.7 | 259 | 18.9 | 120 | 16.7 | 191 | 17.8 | 247 | 24.3 | 111 | 21.6 | 58 | 20.7 | 61 | 21.3 | 0.667 |
| **Azithromycin** | 74 | 32.4 | 100 | 14.0 | 80 | 16.3 | 156 | 23.1 | 193 | 15.5 | 105 | 17.1 | 50 | 28.0 | 8 | 12.5 | 0.022 |
| **Levofloxacin** | 136 | 2.9 | 147 | 2.0 | 75 | 6.7 | 105 | 12.4 | 137 | 15.3 | 107 | 14.0 | 57 | 14.0 | 25 | 20.0 | <0.001 |
| **Trimethoprim/Sulfamethoxazole** | 222 | 47.7 | 276 | 43.5 | 120 | 33.3 | 192 | 36.5 | 258 | 45.0 | 153 | 33.3 | 76 | 25.0 | 97 | 15.5 | <0.001 |
